# Supplementary material for: Somatic copy number gains in MYC, BCL2, and BCL6 identifies a subset of aggressive alternative-DH/TH DLBCL patients
Source: PubMed Central journal article supplement (PMC7652824; doi:10.1038/s41408-020-00382-3), 2020-11-09
Supplement: 41408_2020_382_MOESM1_ESM.pdf [file 41408_2020_382_MOESM1_ESM.pdf]

**Supplemental Table 1. Clinical Characteristics by Cohort**

| Measurement            | Mayo Cohort     | Chapuy <i>et al.</i> Cohort | P                |
|------------------------|-----------------|-----------------------------|------------------|
| N                      | 260             | 219                         |                  |
| Age                    |                 |                             | <b>&lt; .001</b> |
| >60                    | 155 (59.6%)     | 180 (82.2%)                 |                  |
| <=60                   | 105 (40.4%)     | 39 (17.8%)                  |                  |
| Sex                    |                 |                             | .411             |
| Male                   | 151 (58.1%)     | 119 (54.3%)                 |                  |
| Female                 | 109 (41.9%)     | 100 (45.7%)                 |                  |
| IPI                    |                 |                             | .496             |
| 0-1                    | 106 (40.8%)     | 78 (35.6%)                  |                  |
| 2                      | 65 (25.0%)      | 50 (22.8%)                  |                  |
| 3                      | 60 (23.1%)      | 61 (27.9%)                  |                  |
| 4-5                    | 29 (11.1%)      | 28 (12.8%)                  |                  |
|                        |                 | NA = 2                      |                  |
| Stage                  |                 |                             | .560             |
| I-II                   | 113 (43.5%)     | 101 (46.1%)                 |                  |
| III-IV                 | 147 (56.5%)     | 118 (53.9%)                 |                  |
| Treatment              |                 |                             |                  |
| R-CHOP                 | 194 (74.6%)     | Non-R-CHOP-like             |                  |
| R2-CHOP                | 23 (8.8%)       | Chemo = 4 (1.8%)            |                  |
| MR-CHOP                | 21 (8.1%)       |                             |                  |
| R-EPOCH                | 12 (4.6%)       |                             |                  |
| COO                    |                 |                             | <b>&lt; .001</b> |
| ABC-like               | 82 (31.6%)      | 87 (39.7%)                  |                  |
| GCB                    | 136 (52.3%)     | 67 (30.6%)                  |                  |
| Unclassified           | 12 (4.6%)       | 27 (12.3%)                  |                  |
| NA                     | 30 (11.5%)      | 38 (17.4%)                  |                  |
| EFS24                  |                 |                             | .931             |
| Achieved               | 180 (69.2%)     | 153 (69.9%)                 |                  |
|                        | Not reached n=1 | Not reached n=13            |                  |
| Group                  |                 |                             | <b>&lt; .001</b> |
| DH/TH                  | 14 (5.4%)       | 7 (3.2%)                    |                  |
| Alternative-DH/TH      | 24 (9.2%)       | 26 (11.9%)                  |                  |
| Translocation Positive | 93 (35.8%)      | 55 (25.1%)                  |                  |
| Copy Gain Positive     | 51 (19.6%)      | 82 (37.4%)                  |                  |
| No Alteration          | 78 (30.0%)      | 49 (22.4%)                  |                  |

Abbreviations: IPI, International Prognostic Index; COO, Cell-of-Origin; ABC-like, Activated B-cell Like; GCB, Germinal Center B-cell; NA, Not Applicable; EFS24, Event Free Survival at 24 months; DH/TH, Double-Hit/Triple-Hit

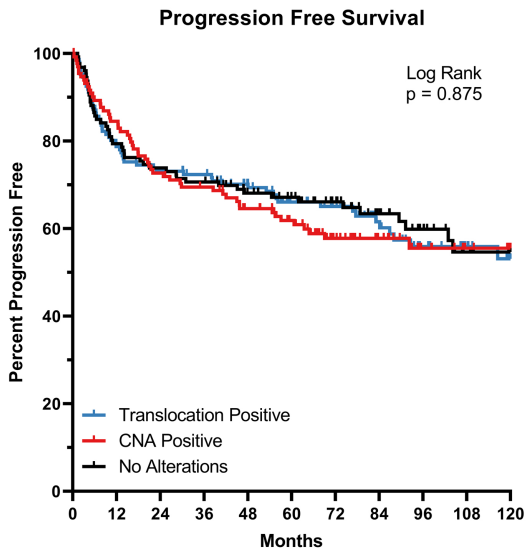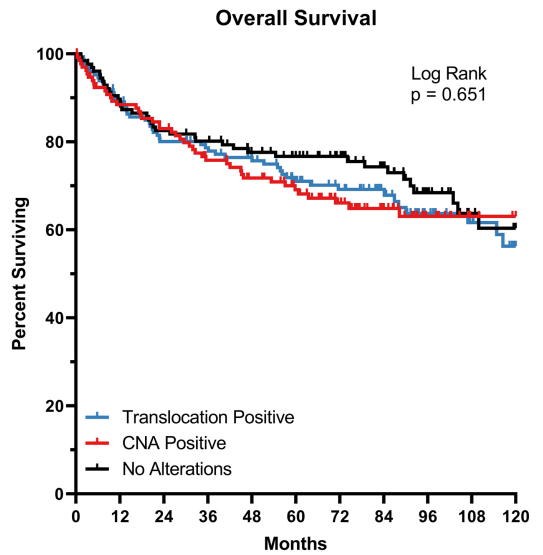

**Supplemental Figure 1 - Survival outcomes of control patient groups.** Kaplan-Meier curves for Progression Free (EFS/PFS) and Overall Survival of Translocation Positive, CNA Positive, and No Alterations patient groups. P values listed on each graph were derived from a Log Rank test.
